# Supplementary material for: Distinct bilateral prefrontal activity patterns associated with the qualitative aspect of working memory characterized by individual sensory modality dominance
Source: PubMed Central journal article supplement (PMC7449398; doi:10.1371/journal.pone.0238235), 2020-08-26
Supplement: pone.0238235.s001.pdf [file pone.0238235.s001.pdf]

# Supporting Information

## Title

Distinct bilateral prefrontal activity patterns associated with the qualitative aspect of working memory characterized by individual sensory modality dominance

## Authors

Mayuko Matsumoto, Takeshi Sakurada and Shin-ichiroh Yamamoto

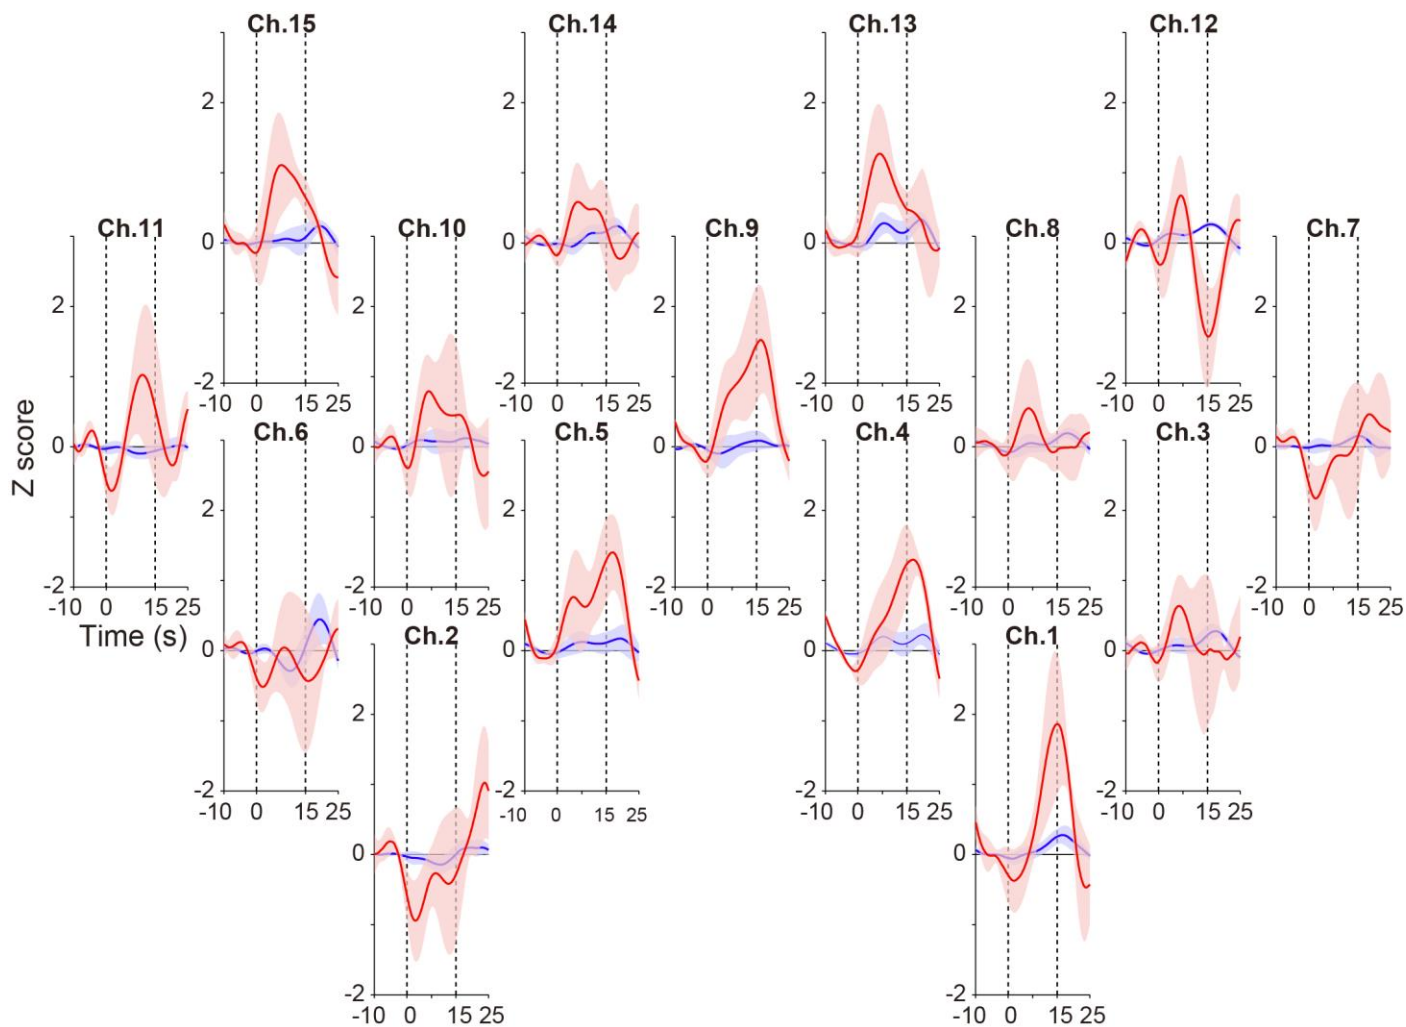

**S1 Fig. Typical temporal profiles of all recording channels in the TD individuals (first 2 sessions).**

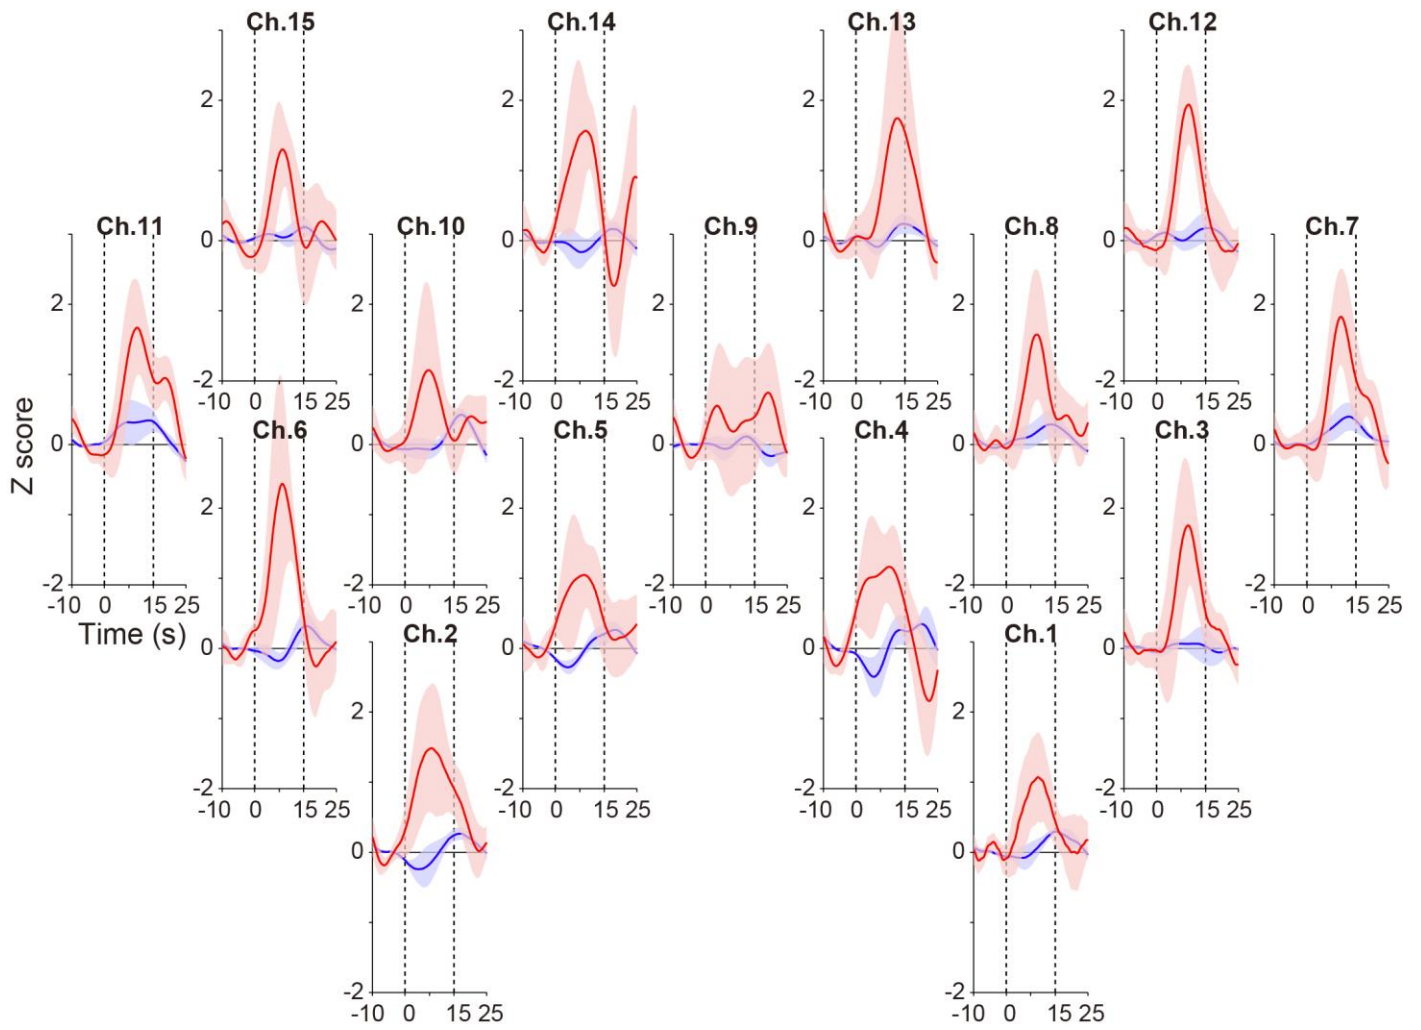

**S2 Fig. Typical temporal profiles of all recording channels in the VD individuals (first 2 sessions).**

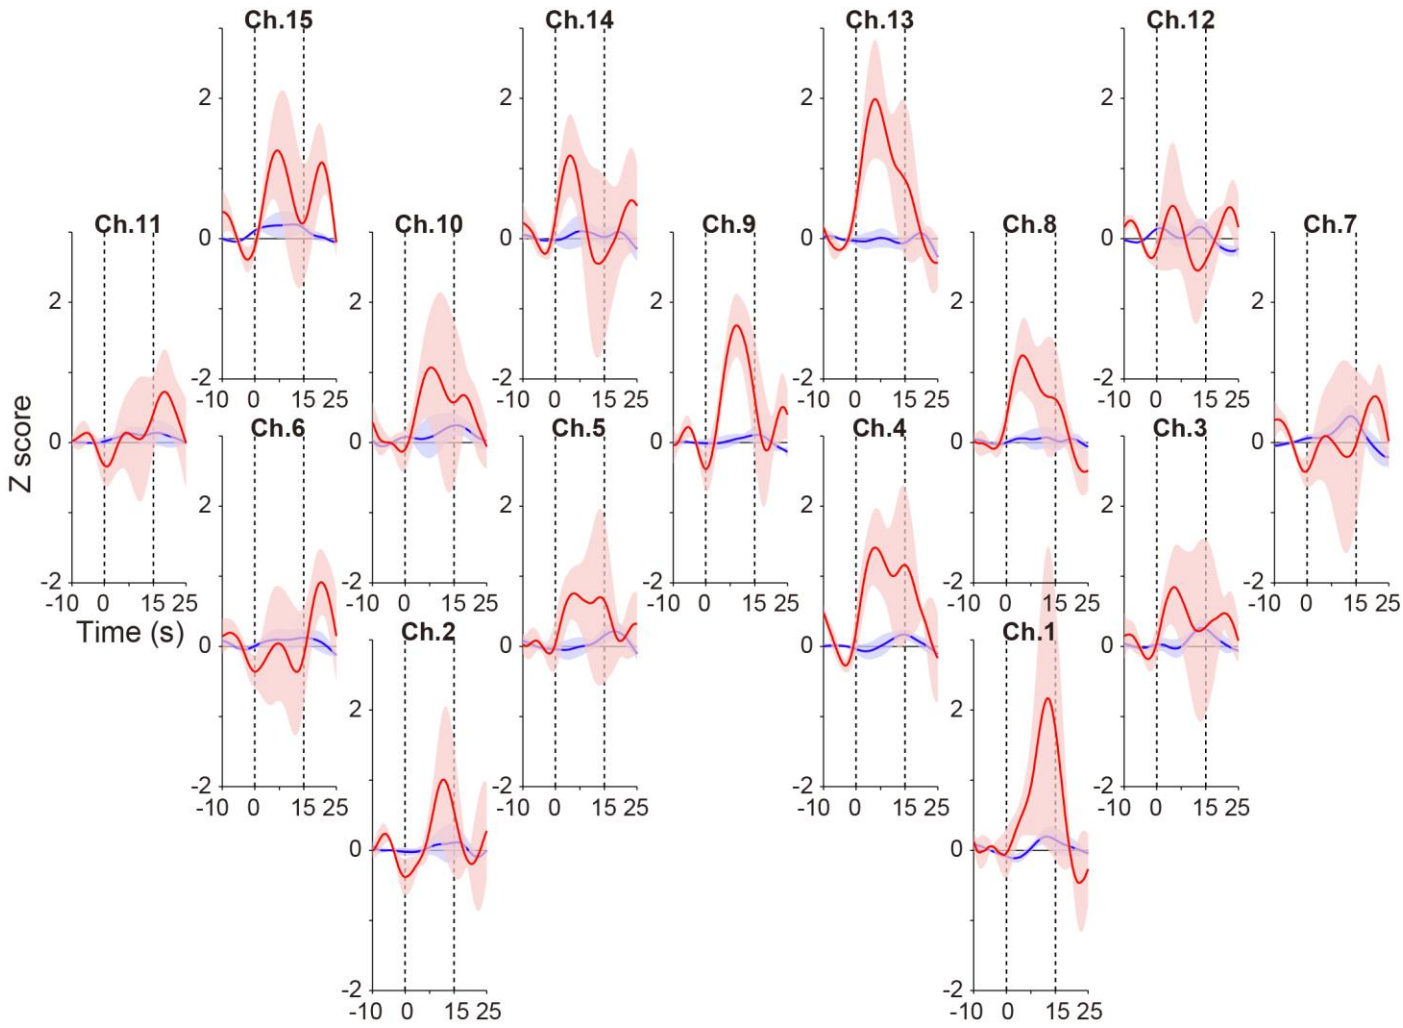

**S3 Fig. Typical temporal profiles of all recording channels in the TD individuals (last 2 sessions).**

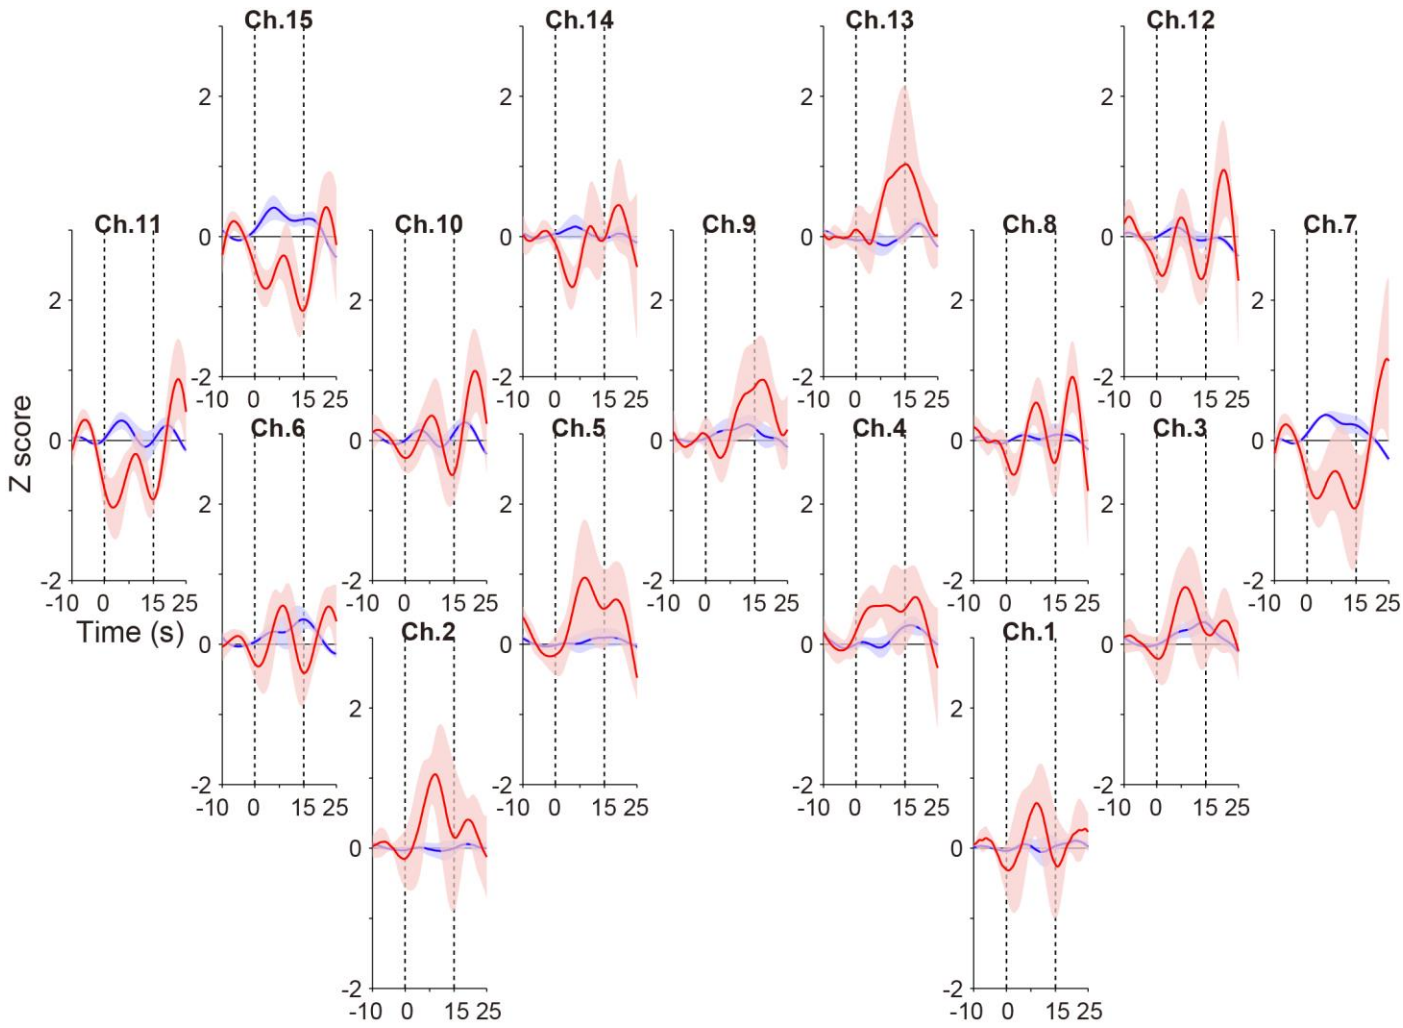

S4 Fig. Typical temporal profiles of all recording channels in the VD individuals (last 2 sessions).

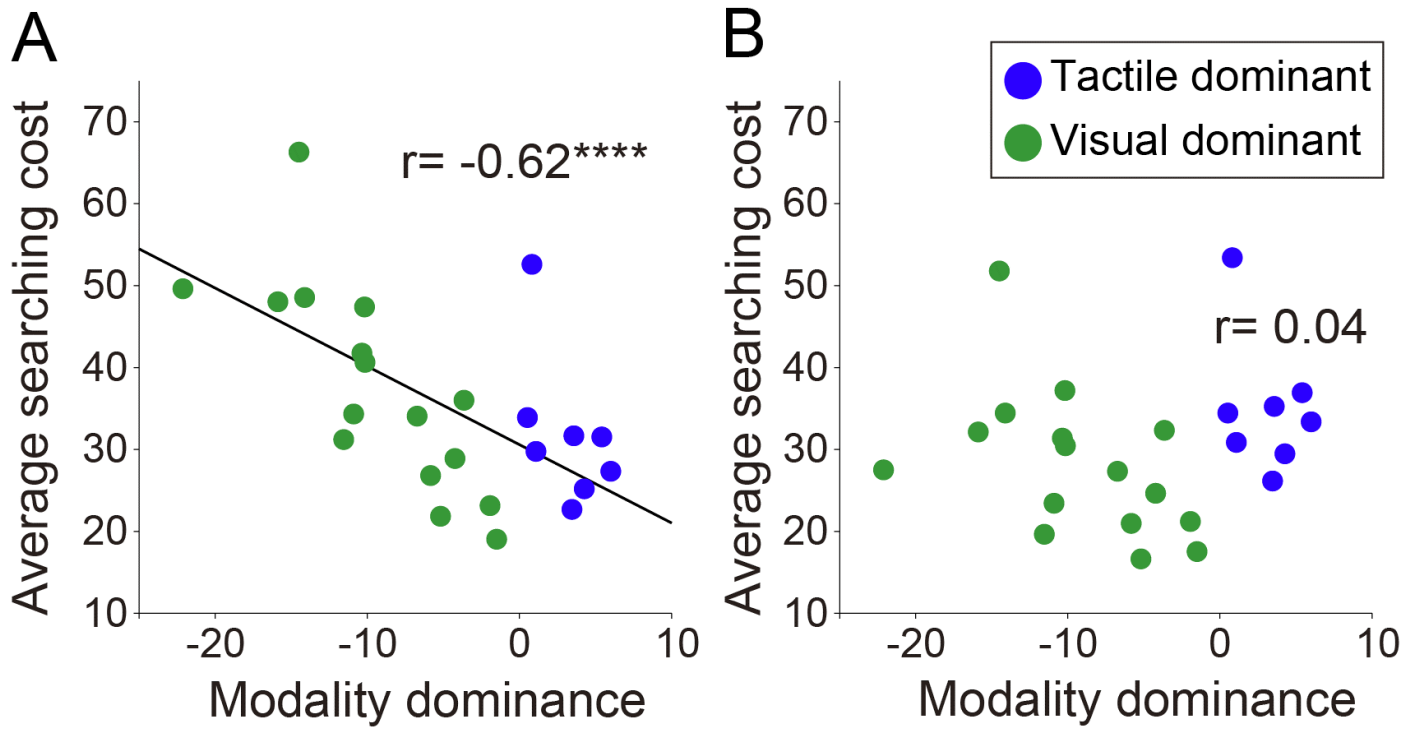

**S5 Fig. Correlations between modality dominance and searching cost in the tactile (A) and visual (B) conditions.**

The horizontal axis indicates the individual modality dominance and the longitudinal axis indicates the individual mean

searching cost averaged from the 2nd to 15th trials. \*\*\*\* $p < 0.001$
